# Supplementary material for: Excited-state dynamics of phenol–pyridinium biaryl
Source: Royal Society of Chemistry journal article supplement (doi:10.1039/c1cp22829c), 2011-10-21
Supplement: c1cp22829c.pdf [file c1cp22829c.pdf]

## Supporting Information

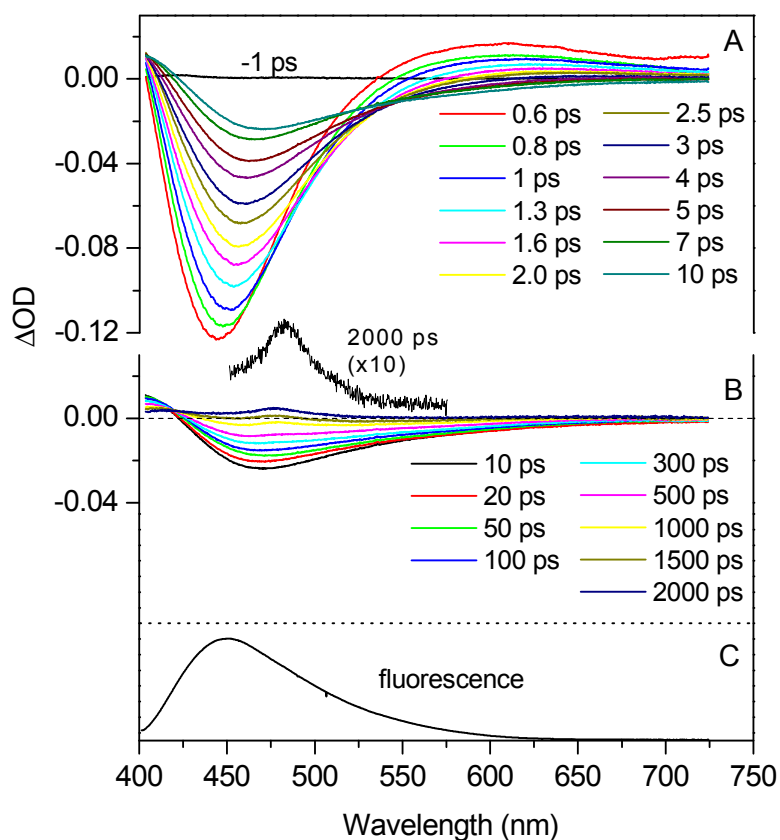

Fig. S1. PPA spectra of HOPPy-1 in MeCN after pump excitation at 383 nm. For clarity, the spectral evolution is separated in 2 time domains 0-10 ps (A) and 10-2000 ps (B). An enhancement of the 450-575 nm region of the spectrum recorded at 2000 ps is also shown. The -1 ps trace corresponds to the spectral baseline in the absence of pump excitation. A reference steady-state fluorescence spectrum of HOPPy-1 in MeCN is given (C).

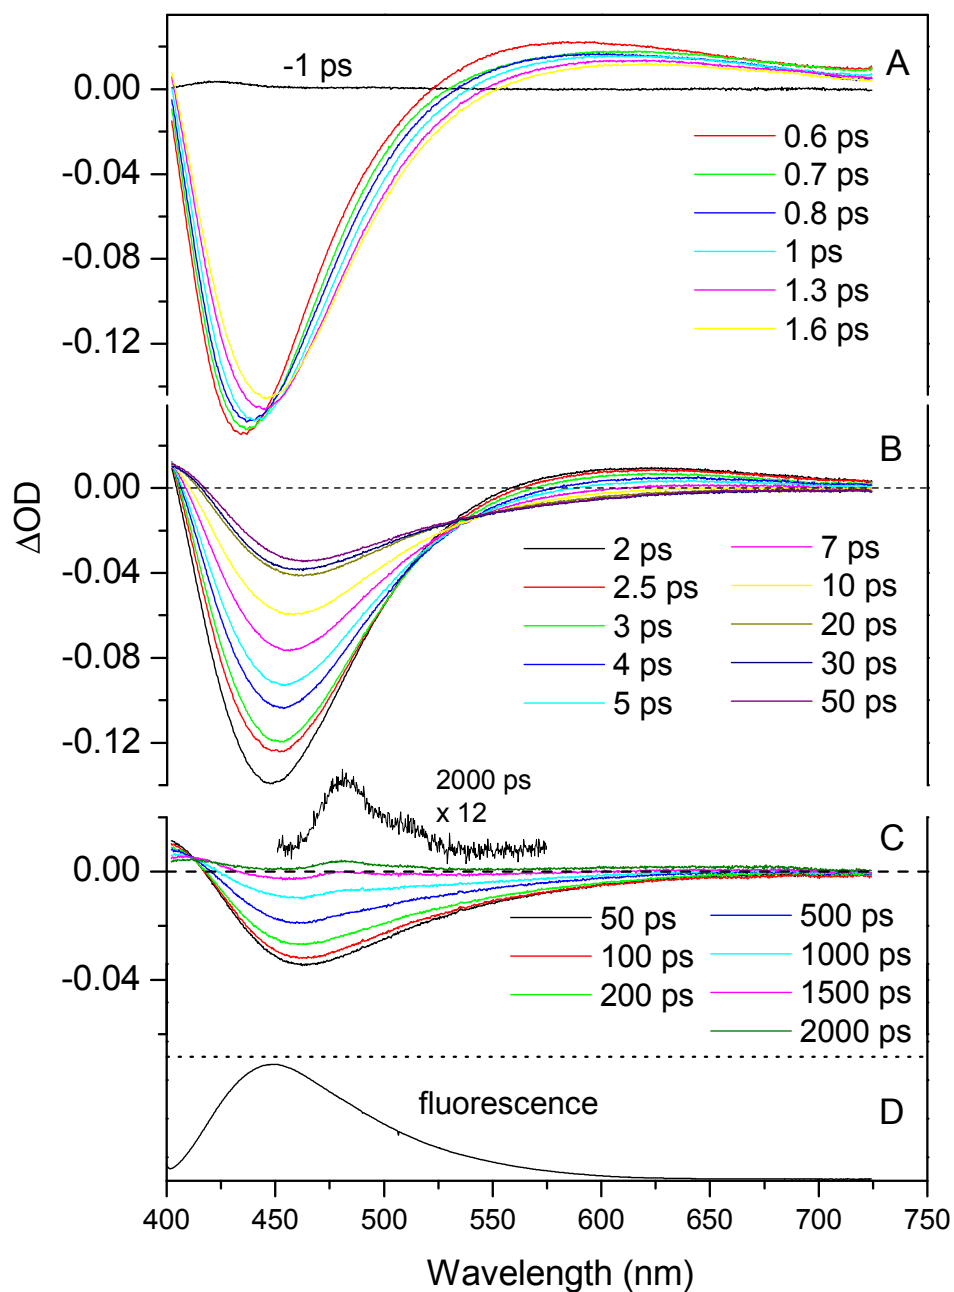

Fig. S2. PPA spectra of HOPPy-1 in BuCN after pump excitation at 383 nm. For clarity, the spectral evolution is separated in 3 time domains 0-1.6 ps (A), 2-50 ps (B), and 50-2000 ps (C). An enhancement of the 450-575 nm region of the spectrum recorded at 2000 ps is also shown. The -1 ps trace corresponds to the spectral baseline in the absence of pump excitation. A reference steady-state fluorescence spectrum of HOPPy-1 in BuCN is given (D).

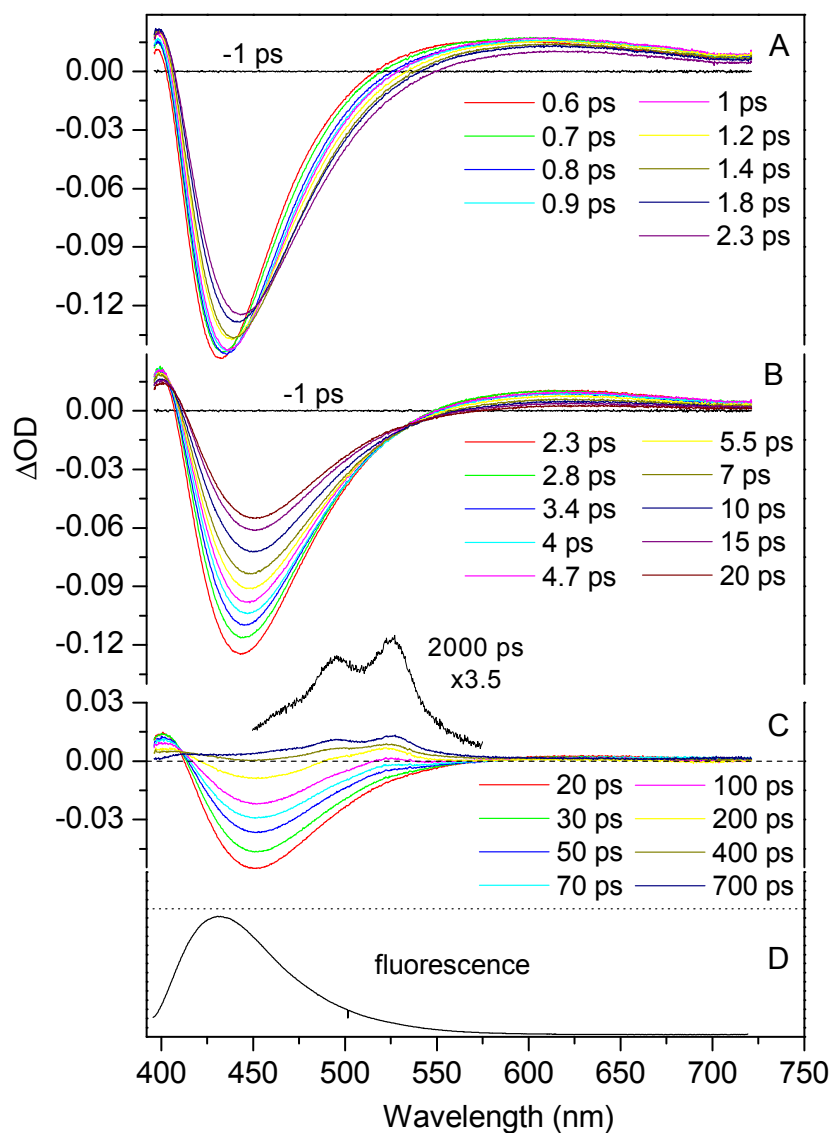

Fig. S3. PPA spectra of HOPPy-1 in THF after pump excitation at 383 nm. For clarity, the spectral evolution is separated in 3 time domains 0-2.3 ps (A), 2.3-20 ps (B), and 50-700 ps (C). An enhancement of the 450-575 nm region of the spectrum recorded at 700 ps is also shown. The -1 ps trace corresponds to the spectral baseline in the absence of pump excitation. A reference steady-state fluorescence spectrum of HOPPy-1 in THF is given (D).

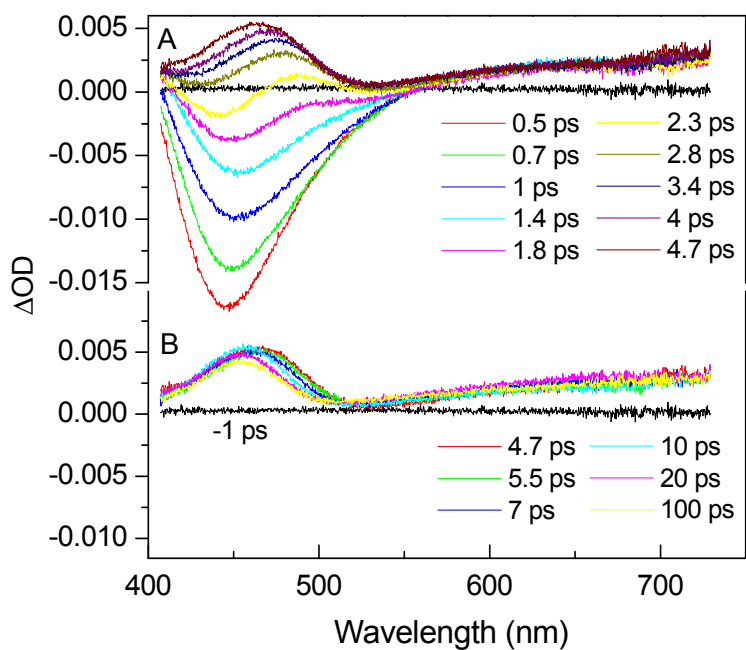

Fig. S4. PPA spectra of HOPPy-1 in water after pump excitation at 383 nm. For clarity, the spectral evolution is separated in 2 time domains 0-4.7 ps (A) and 4.7-100 ps (B). The -1 ps trace corresponds to the spectral baseline in the absence of pump excitation.

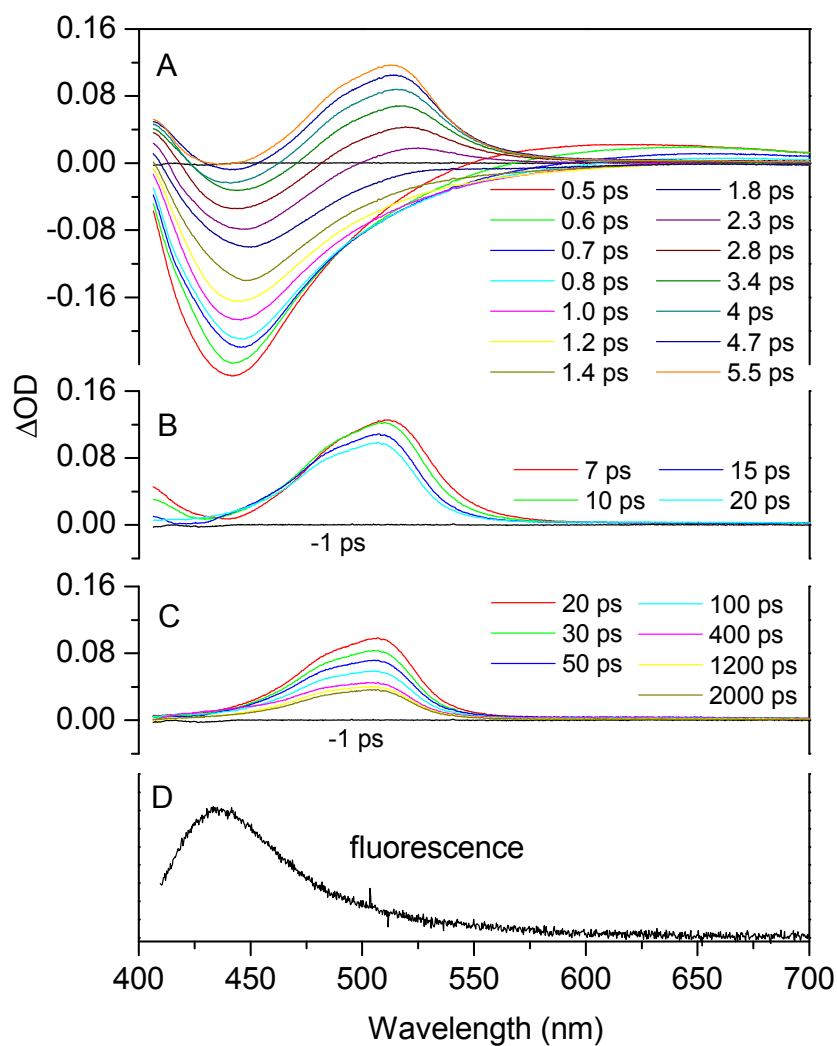

Fig. S5. PPA spectra of HOPPy-1 in EtOH after pump excitation at 383 nm. For clarity, the spectral evolution is separated in 3 time domains 0-5.5 ps (A), 7-20 ps (B), and 20-2000 ps (C). The -1 ps trace corresponds to the spectral baseline in the absence of pump excitation. A reference steady-state fluorescence spectrum of HOPPy-1 in EtOH is given (D).

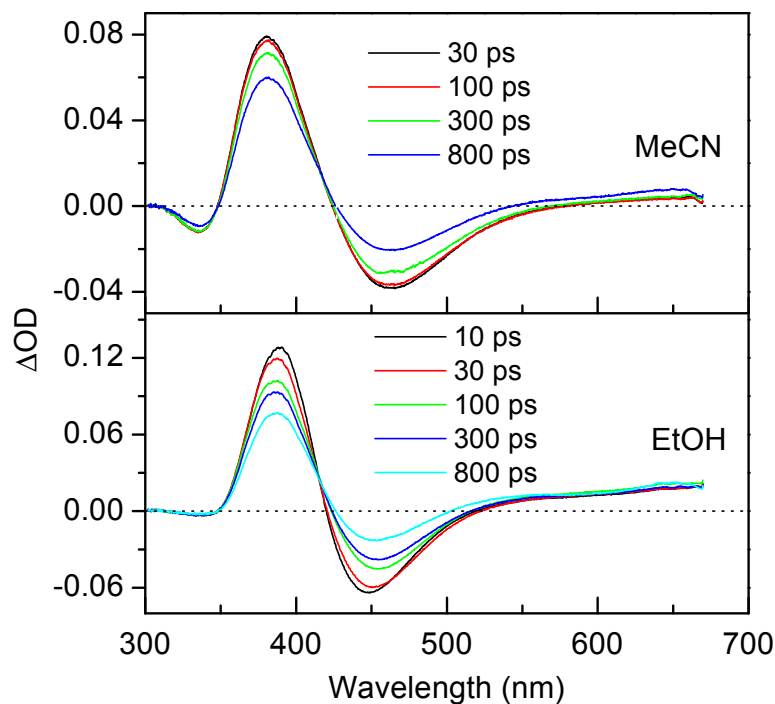

Fig. S6. PPA spectra of MOPPy-1 in MeCN (top) and EtOH (bottom) after excitation at 266 nm. The pump-probe time delays are given. The negative bands at  $\sim 340$  and  $\sim 450$  nm correspond to the ground state bleach (GSB) and stimulated emission (SE), respectively. The TA band at  $\sim 390$  nm is due to the excited state absorption (ESA). The broad positive signal seen above 525 nm in EtOH is due to the presence of solvated electron produced by two-photon ionization of the solvent. Excited state lifetimes of  $\sim 1.3$  and  $\sim 2.5$  ns are estimated from the ESA and SE decay kinetics in MeCN and EtOH, respectively, in satisfactory agreement with the reported fluorescence decay times lifetimes (1.36 and 2.1 ns<sup>28</sup>).

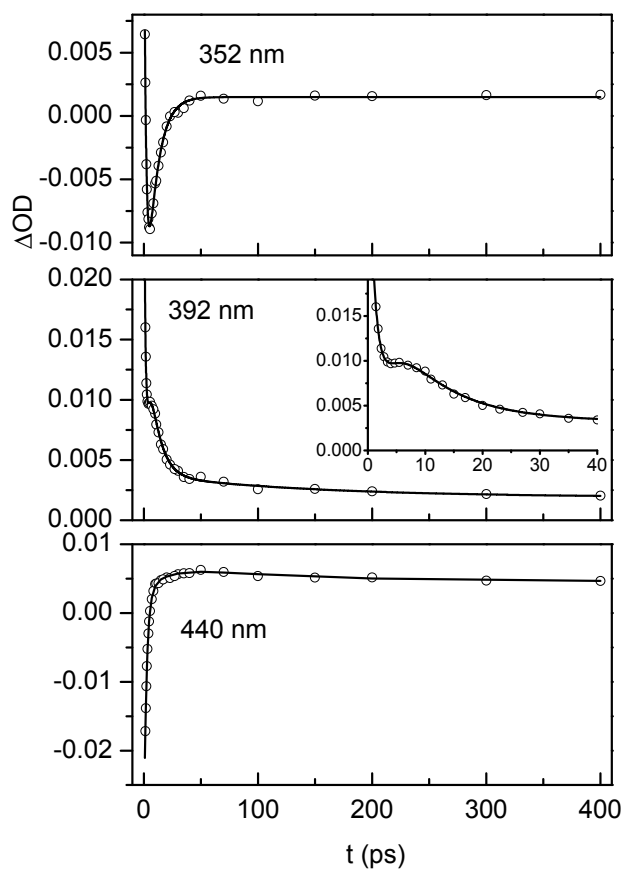

Fig. S7. Kinetic plots measured at 352 nm (GSB band), 392 nm (TA band), and 440 nm (SE band) for HOPPy-1 in EtOH (pump excitation at 266 nm).

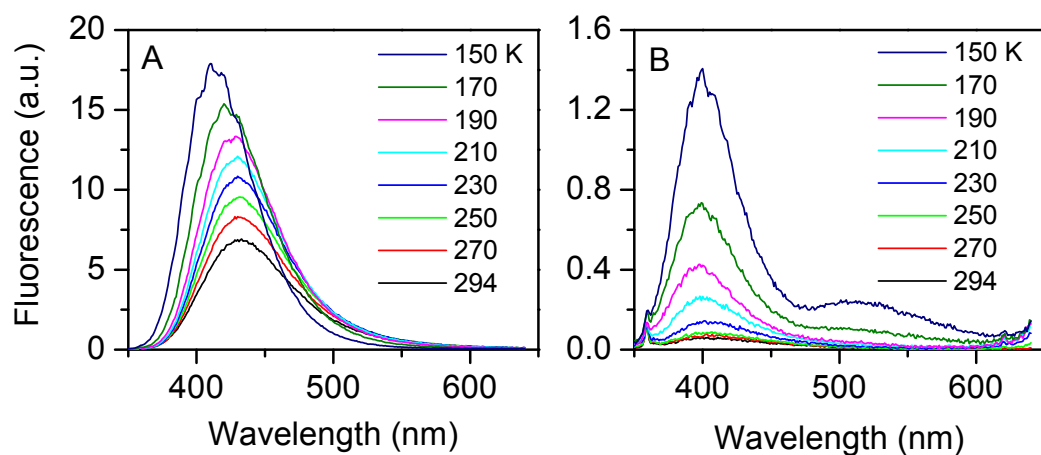

Fig. S8. Comparison of the temperature dependence of the fluorescence spectra of MOPPy-1 (A) and HOPPy-1 (B) in EtOH.
